# Supplementary material
Source: PubMed Central journal article supplement (PMC6348151)
Supplement: NIHMS1511882-supplement-2.pdf [file NIHMS1511882-supplement-2.pdf]

**On-line Table 1: Association with hospitalization cost in univariate analyses**

|                                 | All Patients (n = 341)                       | Endovascular Therapy (n = 133)               | IV tPA-Only (n = 61)                         | No Reperfusion Therapy (n = 147)             |
|---------------------------------|----------------------------------------------|----------------------------------------------|----------------------------------------------|----------------------------------------------|
| Admission glucose               | Data unavailable                             | 0.057                                        | 0.672                                        | Data unavailable                             |
| Age                             | 0.001                                        | 0.239                                        | 0.170                                        | 0.013                                        |
| Alcohol abuse                   | 0.030                                        | 0.325                                        | 0.220                                        | 0.137                                        |
| Anticoagulation                 | 0.947                                        | 0.653                                        | 0.654                                        | 0.984                                        |
| Antiplatelet use                | Data unavailable                             | Data unavailable                             | 0.194                                        | Data unavailable                             |
| ASPECTS                         | Data unavailable                             | 0.003                                        | Data unavailable                             | Data unavailable                             |
| Atrial fibrillation             | 0.414                                        | 0.987                                        | 0.090                                        | 0.691                                        |
| Coronary artery disease         | 0.729                                        | 0.594                                        | 0.346                                        | 0.519                                        |
| Carotid dissection              | 0.523                                        | 0.793                                        | 0.357                                        | 0.258                                        |
| Carotid stenosis (ipsilateral)  | 0.245                                        | 0.234                                        | 0.541                                        | 0.340                                        |
| Congestive heart failure        | 0.129                                        | 0.514                                        | 0.913                                        | 0.555                                        |
| Chronic kidney disease          | 0.004                                        | 0.441                                        | 0.696                                        | 0.006                                        |
| Dementia                        | 0.178                                        | 0.056                                        | 0.745                                        | 0.197                                        |
| DMII                            | 0.239                                        | 0.194                                        | 0.537                                        | 0.177                                        |
| Endovascular + IV tPA           | NA                                           | 0.090                                        | NA                                           | NA                                           |
| FIV                             | <.001                                        | <.001                                        | <.001                                        | <.001                                        |
| Left hemisphere                 | 0.606                                        | 0.331                                        | 0.931                                        | 0.786                                        |
| HT1 or HT2                      | Variable not included in univariate analysis | 0.789                                        | Variable not included in univariate analysis | Variable not included in univariate analysis |
| Hyperlipidemia                  | 0.239                                        | 0.192                                        | 0.941                                        | 0.617                                        |
| Hypertension                    | 0.796                                        | 0.036                                        | 0.763                                        | 0.188                                        |
| Illicit drug use                | 0.609                                        | No observations                              | No observations                              | 0.796                                        |
| International normalized ratio  | Data unavailable                             | Data unavailable                             | 0.704                                        | Data unavailable                             |
| Intubation for IA treatment     | NA                                           | 0.197                                        | NA                                           | NA                                           |
| Level of occlusion <sup>a</sup> | 0.127                                        | 0.768                                        | 0.8587                                       | 0.037                                        |
| mTICI score <sup>a</sup>        | NA                                           | 0.031                                        | NA                                           | NA                                           |
| NIHSS                           | <.001                                        | 0.034                                        | <.001                                        | 0.014                                        |
| Obesity                         | 0.028                                        | 0.201                                        | 0.110                                        | 0.333                                        |
| Obstructive sleep apnea         | 0.177                                        | 0.137                                        | 0.968                                        | 0.352                                        |
| Stroke onset to treatment (min) | NA                                           | 0.842                                        | 0.940                                        | NA                                           |
| PH1                             | <.001                                        | 0.002                                        | 0.602                                        | 0.069                                        |
| PH1 or PH2                      | <.001                                        | 0.002                                        | 0.078                                        | 0.069                                        |
| PH2                             | 0.073                                        | 0.164                                        | 0.251                                        | No observations                              |
| Platelet count                  | Variable not included in univariate analysis | Variable not included in univariate analysis | 0.972                                        | Variable not included in univariate analysis |
| Pre-IV tPA DBP                  | NA                                           | NA                                           | 0.508                                        | NA                                           |
| Pre-IV tPA SBP                  | NA                                           | NA                                           | 0.623                                        | NA                                           |
| Prior stroke                    | Data unavailable                             | Data unavailable                             | 0.970                                        | Data unavailable                             |
| Psychiatric comorbidity         | 0.696                                        | 0.181                                        | 0.738                                        | 0.914                                        |
| Sex                             | 0.123                                        | 0.147                                        | 0.653                                        | 0.590                                        |
| Tobacco abuse                   | 0.009                                        | 0.084                                        | 0.653                                        | 0.101                                        |
| Wake-up stroke                  | Data unavailable                             | 0.212                                        | Data unavailable                             | Data unavailable                             |
| Weight (kg)                     | Variable not included in univariate analysis | Variable not included in univariate analysis | 0.382                                        | Variable not included in univariate analysis |

**Note:**—NA indicates not applicable; IA, intra-arterial (ie, endovascular); DBP, diastolic blood pressure; SBP, systolic blood pressure; HT1 and HT2, hemorrhagic transformation types 1 and 2; DMII, diabetes mellitus II.

<sup>a</sup>Multilevel variable.

**On-line Table 2: Patients with-versus-without EWOC**

|                                     | EWOC (n = 88)            | Non-EWOC (n = 341)         | P Value |
|-------------------------------------|--------------------------|----------------------------|---------|
| Cost (median) (IQR)                 | \$6664 (\$4868–\$13,765) | \$16,446 (\$9823–\$27,165) | <.0001  |
| Age (median) (IQR) (yr)             | 80 (71–86)               | 69 (57–80)                 | <.0001  |
| FIV (median) (IQR) (mL)             | 161.5 (90–243)           | 59.9 (17.1–129)            | <.0001  |
| Baseline NIHSS score (median) (IQR) | 21 (16–25)               | 16 (13–21)                 | <.0001  |
| PH1 and PH2 (No.) (%)               | 14 (15.91%)              | 23 (6.7%)                  | .0089   |

**On-line Table 3: Sensitivity analyses (all analyses controlled for treatment modality)**

|                                                         | P Value | Partial Eta <sup>2</sup> | Exponentiated $\beta$ -Coefficient (95% CI) |
|---------------------------------------------------------|---------|--------------------------|---------------------------------------------|
| All patients with ACLVO including EWOC                  |         |                          |                                             |
| Age (yr)                                                | <.0001  | 5.17%                    | 0.9892 (0.9848–0.9936)                      |
| FIV (mL)                                                | .0010   | 2.59%                    | 1.0012 (1.0004–1.0017)                      |
| PH type 1                                               | .0016   | 2.37%                    | 1.5864 (1.1928–2.1095)                      |
| Tobacco                                                 | .0019   | 2.30%                    | 1.2394 (1.0830–1.4185)                      |
| Hyperlipidemia                                          | .0140   | 1.44%                    | 0.8564 (0.7569–0.9690)                      |
| Chronic kidney disease                                  | .0186   | 1.32%                    | 1.3684 (1.0541–1.7761)                      |
| Hypertension                                            | .0193   | 1.31%                    | 1.2379 (1.0354–1.4799)                      |
| All patients with ACLVO including EWOC <sup>a</sup>     |         |                          |                                             |
| EWOC                                                    | <.0001  | 22.39%                   | 0.4205 (0.3601–0.4912)                      |
| FIV (mL)                                                | <.0001  | 13.21%                   | 1.0025 (1.0019–1.0032)                      |
| PH type 1                                               | .0017   | 2.35%                    | 1.5143 (1.1715–1.9590)                      |
| Tobacco                                                 | .0029   | 2.10%                    | 1.1995 (1.0644–1.3519)                      |
| Chronic kidney disease                                  | .0082   | 1.66%                    | 1.3855 (1.0865–1.7421)                      |
| Hyperlipidemia                                          | .0450   | 0.96%                    | 0.8920 (0.7978–0.9974)                      |
| All patients with ACLVO including early/delayed imaging |         |                          |                                             |
| FIV (mL)                                                | <.0001  | 20.36%                   | 1.0039 (1.0029–1.0044)                      |
| PH types 1 and 2                                        | <.0001  | 5.81%                    | 1.6742 (1.3392–2.0926)                      |
| NIHSS                                                   | .0032   | 2.47%                    | 1.0153 (1.0051–1.0255)                      |
| Obstructive sleep apnea                                 | .0050   | 2.34%                    | 1.3292 (1.0905–1.6199)                      |
| Ipsilateral carotid stenosis                            | .0090   | 2.00%                    | 1.2089 (1.0488–1.3934)                      |
| Age (yr)                                                | .0098   | 2.00%                    | 0.9947 (0.9907–0.9987)                      |

<sup>a</sup>Incorporating the early withdrawal of care status in the model.

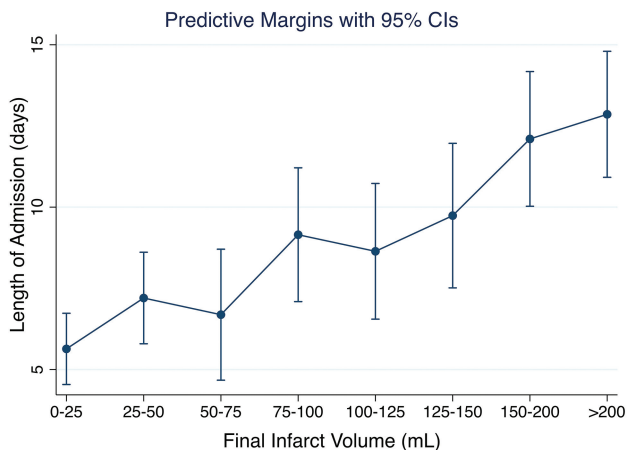

**ON-LINE FIG 1.** Increasing final infarct volume predicts longer acute hospitalization length of stay as assessed through multivariable logistic regression controlling for age, baseline, NIHSS score, and hemorrhagic transformation ( $P < .001$ ).

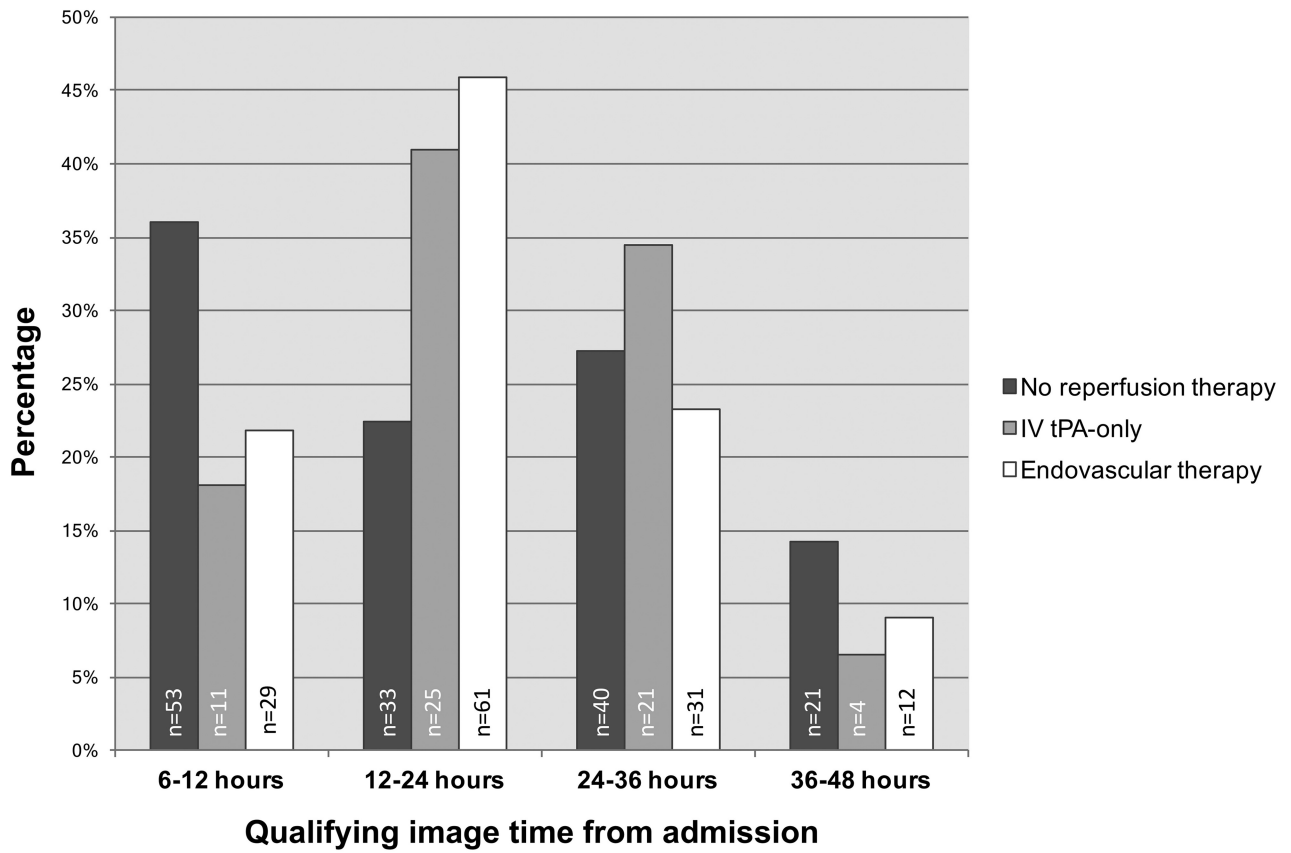

**ON-LINE FIG 2.** Timing of imaging used for final infarct volume calculations.
